# Supplementary material for: Synthesis of fluorescent α-chymotrypsin A-functionalized gold nanoclusters and their application to blot-based technology for Hg2+detection
Source: Royal Society of Chemistry journal article supplement (doi:10.1039/c4ra05686h), 2014-07-15
Supplement: c4ra05686h1.pdf [file c4ra05686h1.pdf]

## Supporting Information

### **Synthesis of Fluorescent $\alpha$ -Chymotrypsin A-functionalized Gold Nanoclusters and Their Application to Blot-based Technology for Hg<sup>2+</sup> Detection**

Pengchang Liu,<sup>a</sup> Li Shang,<sup>b</sup> Hongwei Li,<sup>a</sup> Yuxiao Cui,<sup>c</sup> Yongmei Qin,<sup>d</sup> Yuqing Wu,<sup>a</sup> J. Kalervo Hiltunen,<sup>a, e</sup> Zhijun Chen\*,<sup>a, e</sup> Jiacong Shen<sup>a</sup>

<sup>a</sup> State Key Laboratory of Supramolecular Structure and Materials, Jilin University, 2699 Qianjin Street, 130012 Changchun, P. R. China.

<sup>b</sup> Institute of Applied Physics and Centre for Functional Nanostructures, Karlsruhe Institute of Technology, D-76131 Karlsruhe, Germany.

<sup>c</sup> College of Life Sciences, Jilin University, 2699 Qianjin Street, 130012 Changchun, P. R. China.

<sup>d</sup> The State Key Laboratory of Protein and Plant Gene Research, College of Life Sciences, Peking University, 100871 Beijing, P. R. China.

<sup>e</sup> Faculty of Biochemistry and Molecular Medicine and Biocenter Oulu, University of Oulu, FI-90014 Oulu, Finland.

\* **E-mail:** [zchen@jlu.edu.cn](mailto:zchen@jlu.edu.cn)

#### **Table of contents**

1. **Fig. S1** The fluorescence spectra of synthesized AuNCs@CTRA with different reaction time.
2. **Fig. S2** XPS characterization and TEM image of AuNCs@CTRA.
3. **Fig. S3** The pH stability of the AuNCs@CTRA as indicated by the fluorescence intensity.
4. **Fig. S4** Fluorescence decays of AuNCs@CTRA in HEPES buffer.
5. **Fig. S5** The FT-IR spectra were used for monitoring the synthesis of AuNCs@CTRA.
6. **Fig. S6** The CD spectrum of pure CTRA and AuNCs@CTRA in the aqueous solution.
7. **Fig. S7** The enzymatic activity evaluation of CTRA and CTRA@AuNCs.
8. **Fig. S8** The fluorescence intensity of AuNCs@CTRA in the presence of Hg<sup>2+</sup> or the combination of Hg<sup>2+</sup> and other metal ions.

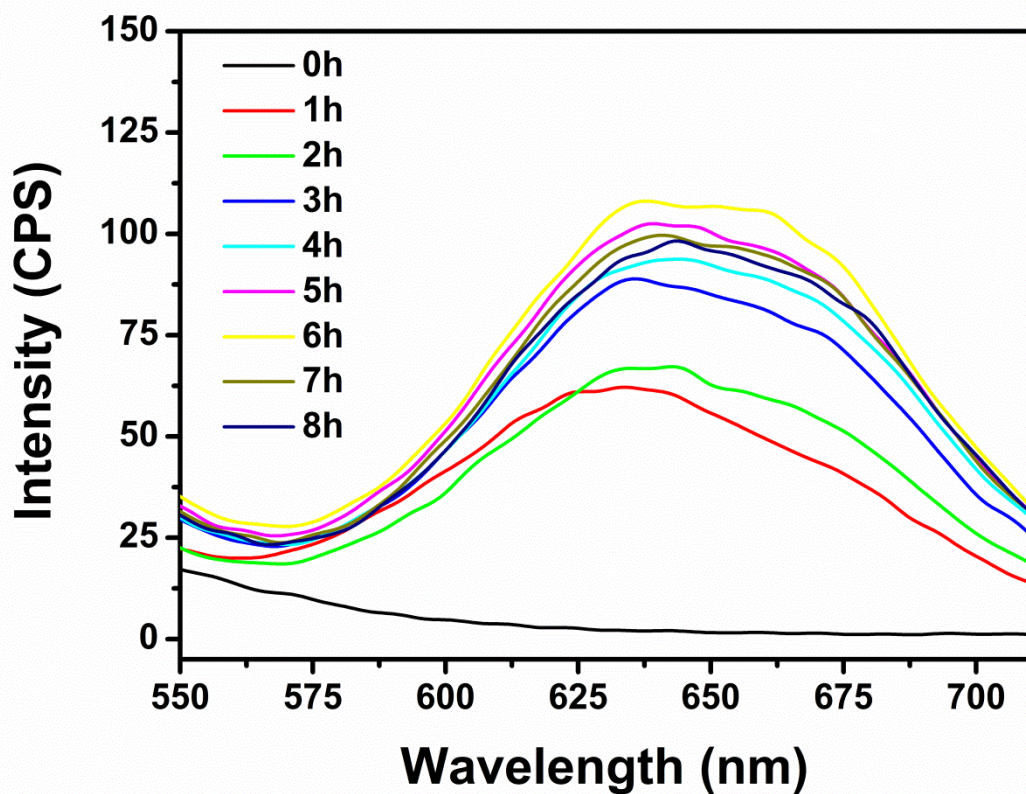

**Fig. S1** The fluorescence spectra of synthesized AuNCs@CTRA with different reaction time (inset).

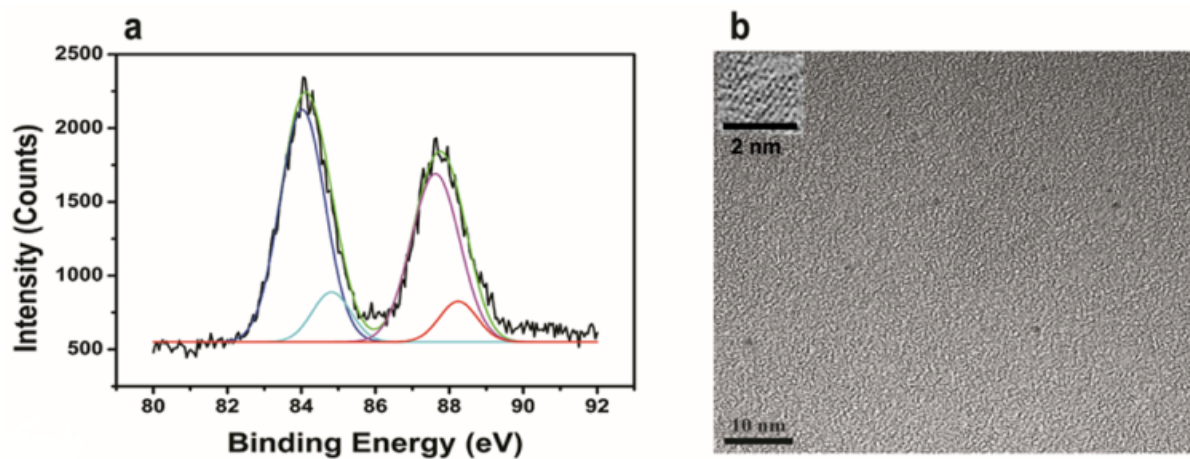

**Fig. S2** XPS characterization and TEM image of AuNCs@CTRA. (a) XPS spectra explain the binding energy of Au4f of AuNCs@CTRA. Navy blue and Light Blue curves indicate Au(0) and Au(I), respectively. (b) TEM image of AuNCs@CTRA, The gold is clearly visible in the TEM image.

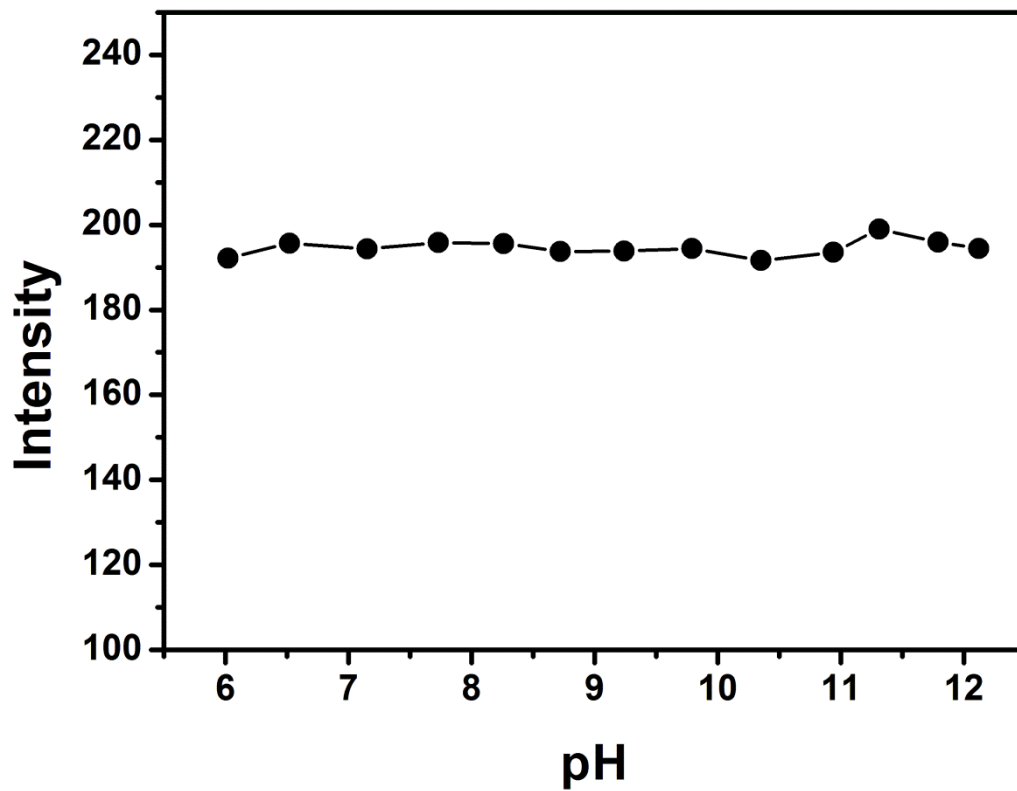

**Fig. S3** The pH stability of the AuNCs@CTRA as indicated by the fluorescence intensity for the CTRA stabilized gold nanoclusters (1.0 mg/mL).

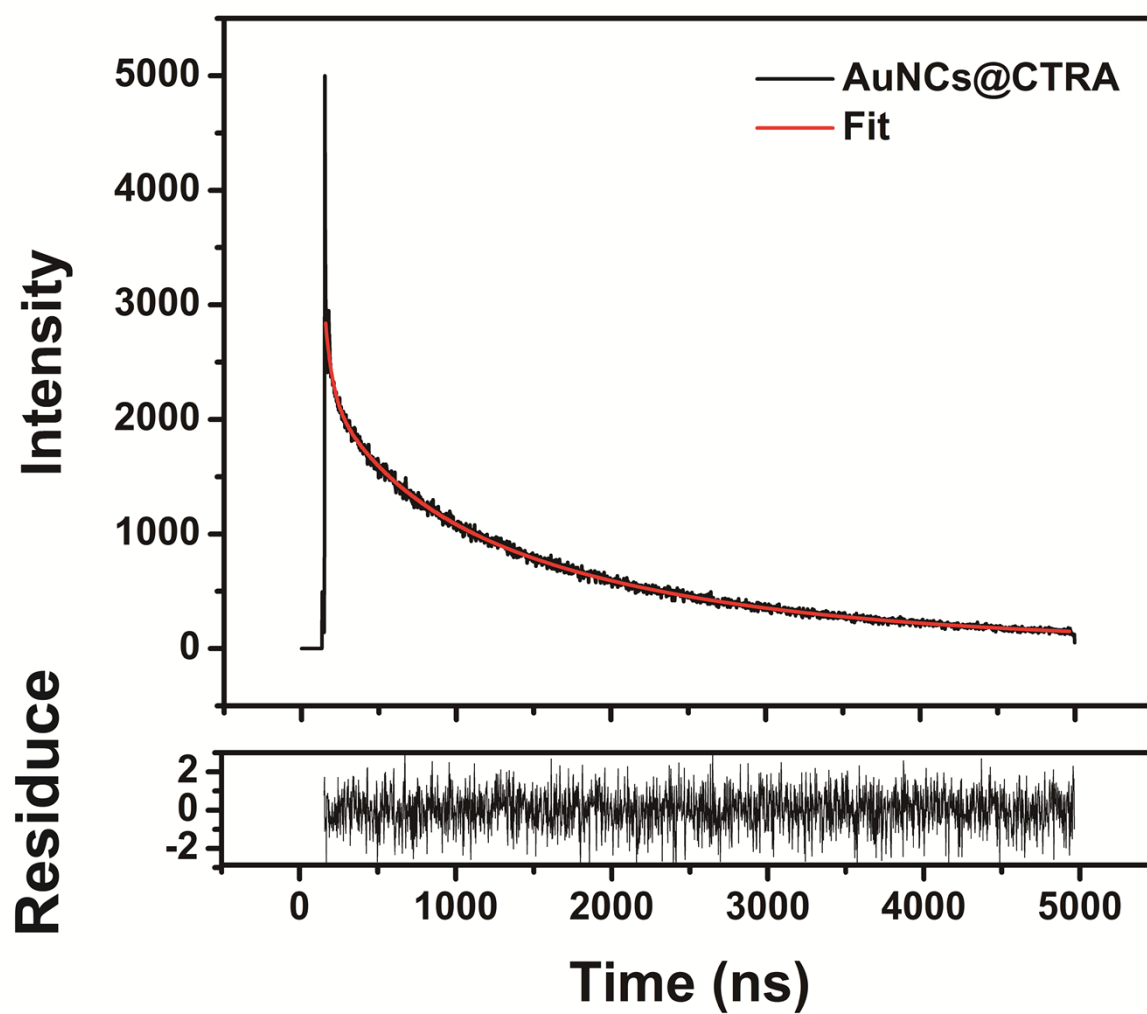

**Fig. S4** Top: Fluorescence decays of AuNCs@CTRA in HEPES buffer (20 mM, pH 7.5). Bottom: Residuals of the fits.

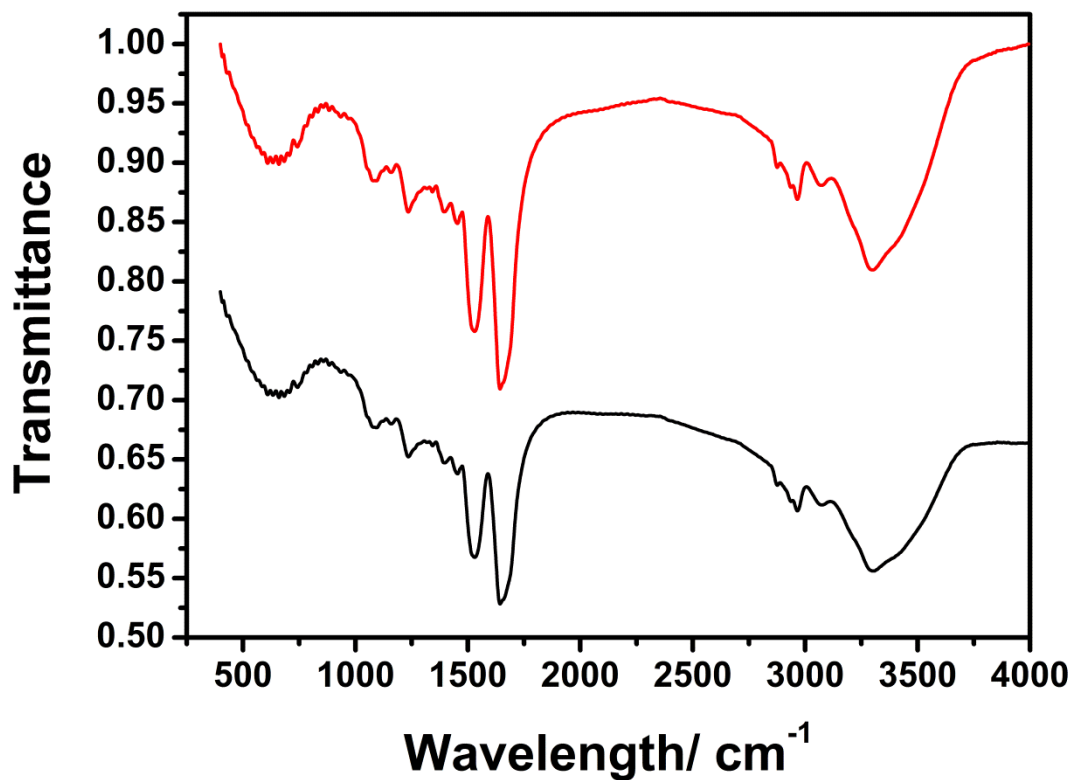

**Fig. S5** The FT-IR spectra were used for monitoring the synthesis of AuNCs@CTRA. The black and red curve depicted the spectrum of pure CTRA and that of AuNCs@CTRA, respectively.

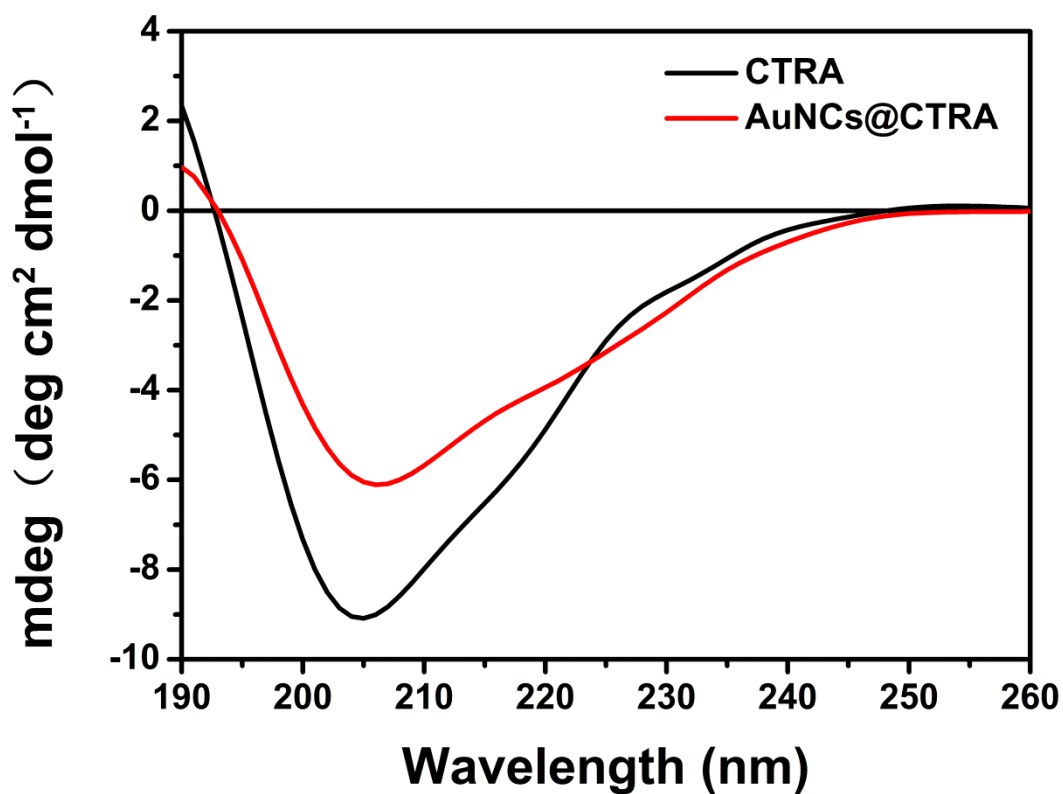

**Fig. S6** The CD spectrum of pure CTRA (Black) and AuNCs@CTRA (Red) in the HEPES buffer (20 mM, pH 7.4).

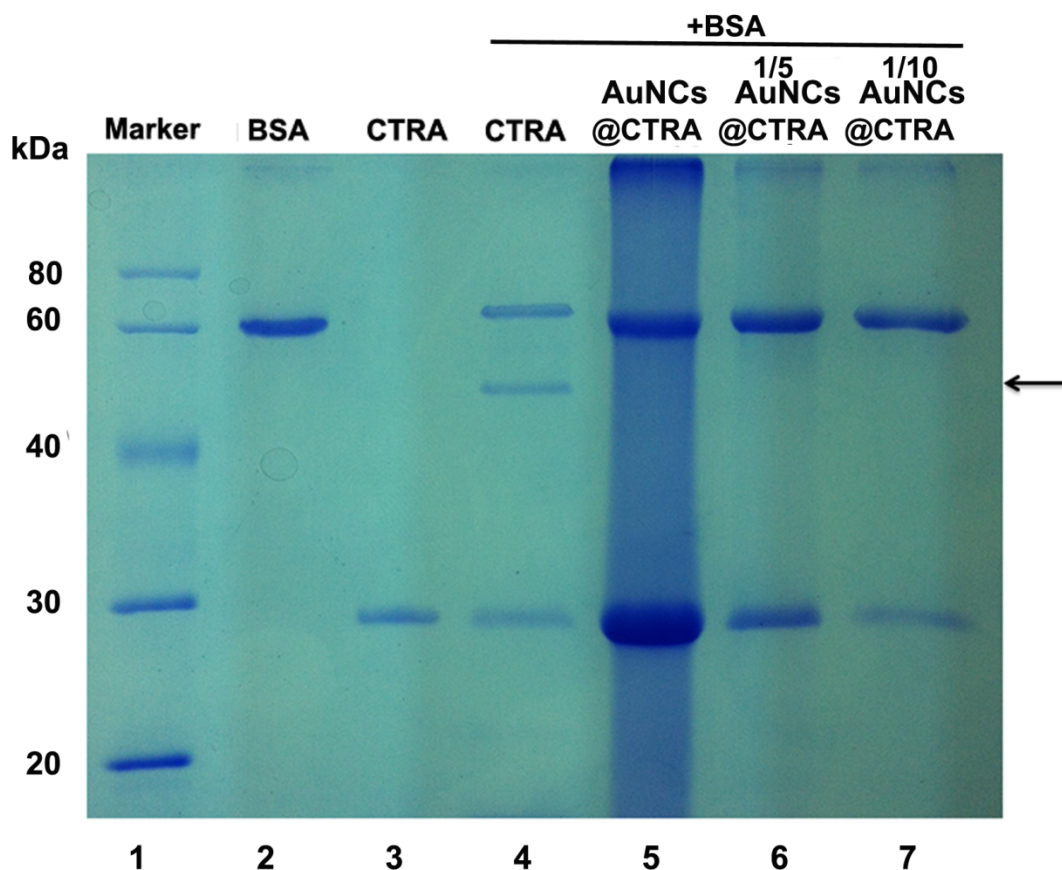

**Fig. S7** SDS-PAGE showed the activity profile of CTRA and AuNCs@CTRA. The amount of BSA (as substrate, lane 2) and CTRA or AuNCs@CTRA (as enzyme, lane 3-5) were 0.5 and 0.3 mg, respectively. Arrow pointed to the digested BSA product. The SDS-PAGE showed that the CTRA activity was lost during the gold nanoclusters synthesis but the polypeptide chain remained uncleaved.



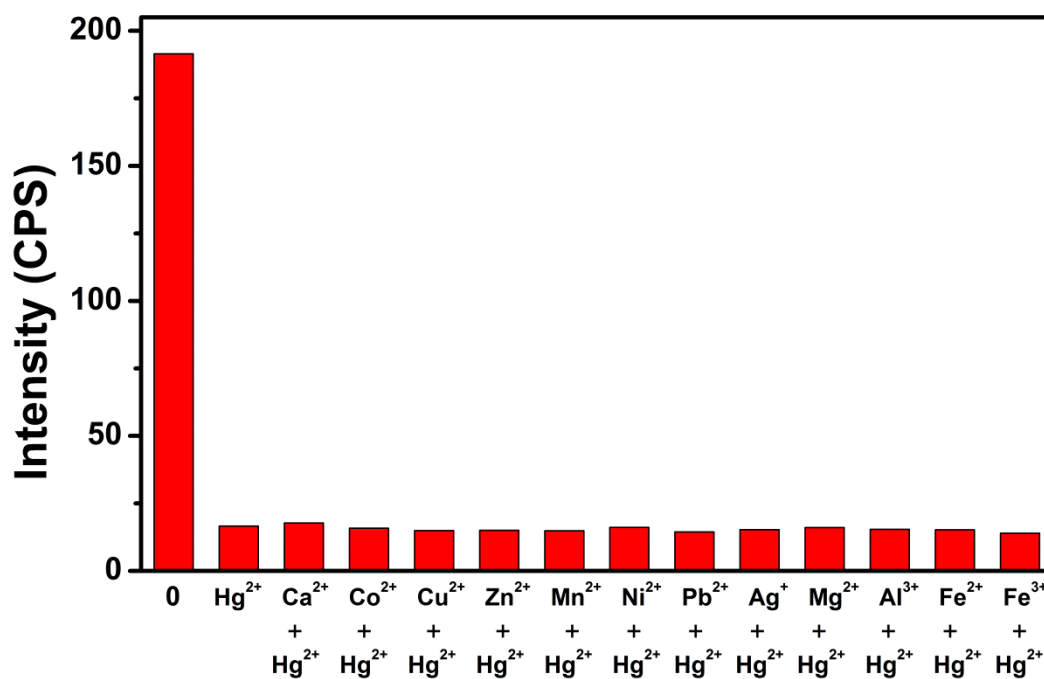

**Fig. S8** The fluorescence intensity of AuNCs@CTRA (1.0 mg/mL) in HEPES buffer (20 mM, pH 7.5) in the presence of Hg<sup>2+</sup> (10.0 μM) or the combination of Hg<sup>2+</sup> (10.0 μM) and other metal ions (10.0 μM).

**Table S1.** Properties of AuNCs-based methods for the determination of Hg (II)

| No. | Detection limit | Readability by naked eye |                     | Reference No.   |
|-----|-----------------|--------------------------|---------------------|-----------------|
|     |                 | under UV light           | under visible light |                 |
| 1   | 0.6 nM          | No                       | No                  | [1]             |
| 2   | 80 nM           | No                       | No                  | [2]             |
| 3   | 25 nM           | No                       | No                  | [3]             |
| 4   | 50 nM           | No                       | No                  | [4]             |
| 5   | 50 nM           | No                       | No                  | [5]             |
| 6   | 50 $\mu$ M      | No                       | Yes                 | [6]             |
| 7   | 8 nM            | Yes                      | Yes                 | Proposed method |

## References

1. C. M. Hofmann, J. B. Essner, G. A. Baker and S. N. Baker, *Nanoscale*, 2014, **6**, 5425-5431
2. D. Hu, Z. Sheng, P. Gong, P. Zhang and L. Cai, *Analyst*, 2010, **135**, 1411-1416.
3. N. Ding, H. Zhao, W. Peng, Y. He, Y. Zhou, L. Yuan and Y. Zhang, *Colloids and Surfaces A: Physicochemical and Engineering Aspects*, 2012, **395**, 161–167.
4. H. Dai, Y. Shi, Y. Wang, Y. Sun, J. Hua, P. Nia and Z. Li, *Biosensors and Bioelectronics*, 2014, **53**, 76-81.
5. H. Kawasaki, K. Yoshimura, K. Hamaguchi, and R. Arakawa, *Analytical Science*, 2011, **27**, 591-596.
6. P. Das, A. Ghosh, H. Bhatt and A. Das, *RSC Advance*, 2012, **2**, 3714-3721.
